# Supplementary material for: Cyanomethylene-bis(phosphonate) as ditopical ligand: stepwise formation of a 2-D heterometallic Fe(iii)–Ag(i) coordination network
Source: Royal Society of Chemistry journal article supplement (doi:10.1039/c2ce06261e), 2012-01-01
Supplement: c2ce06261e.pdf [file c2ce06261e.pdf]

## **Cyanomethylene-bis(phosphonate) as ditopical ligand: stepwise formation of a 2-D heterometallic Fe(III)-Ag(I) coordination network**

Catalin Maxim,<sup>a,b</sup> Diana Branzea,<sup>a</sup> Marius Andruh,<sup>b</sup> Rodolphe Clérac,<sup>c,d</sup> Bogdan Iorga<sup>e</sup> and Narcis Avarvari<sup>\*:a</sup>

### **Supporting Information**

## IR spectra

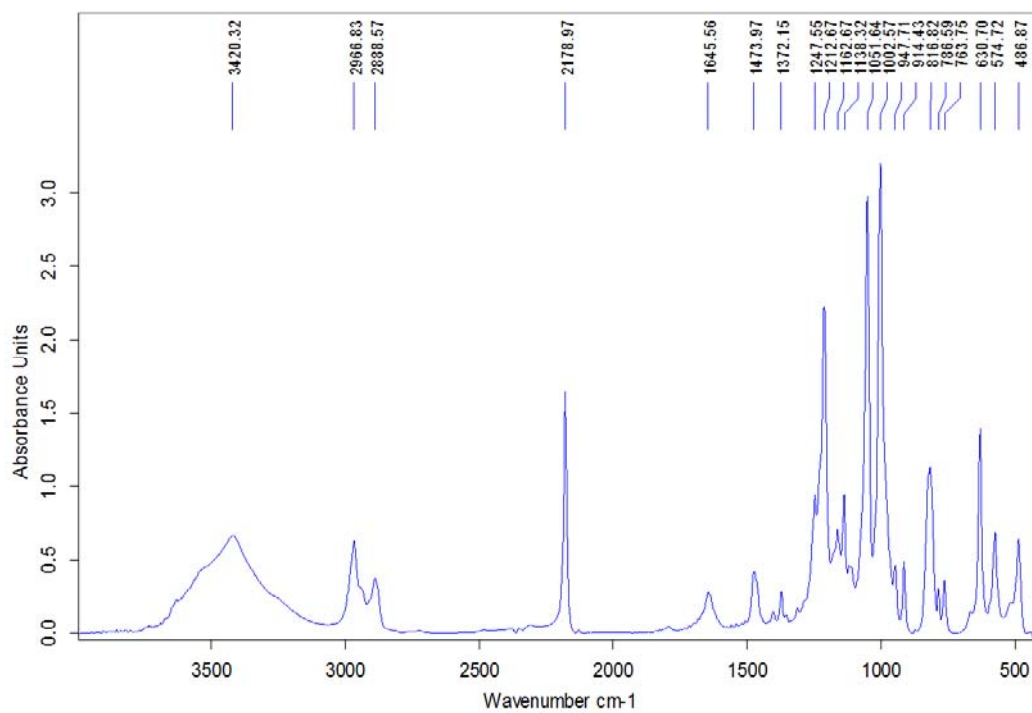

Figure S1. IR spectrum of **1**

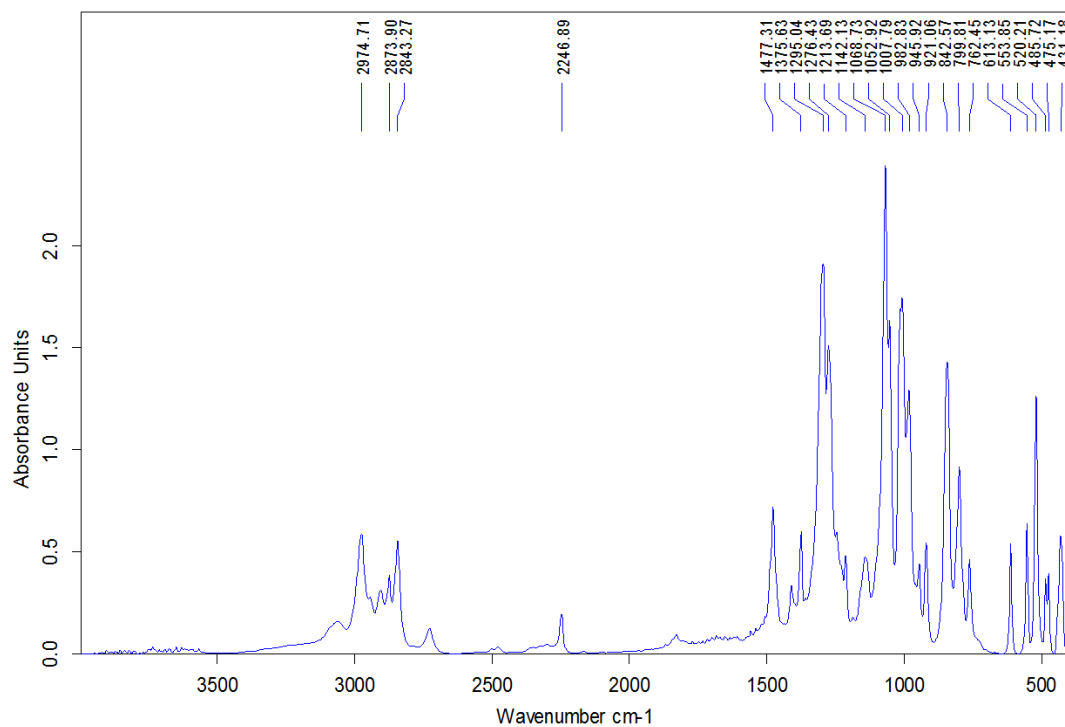

Figure S2. IR spectrum of **1'**

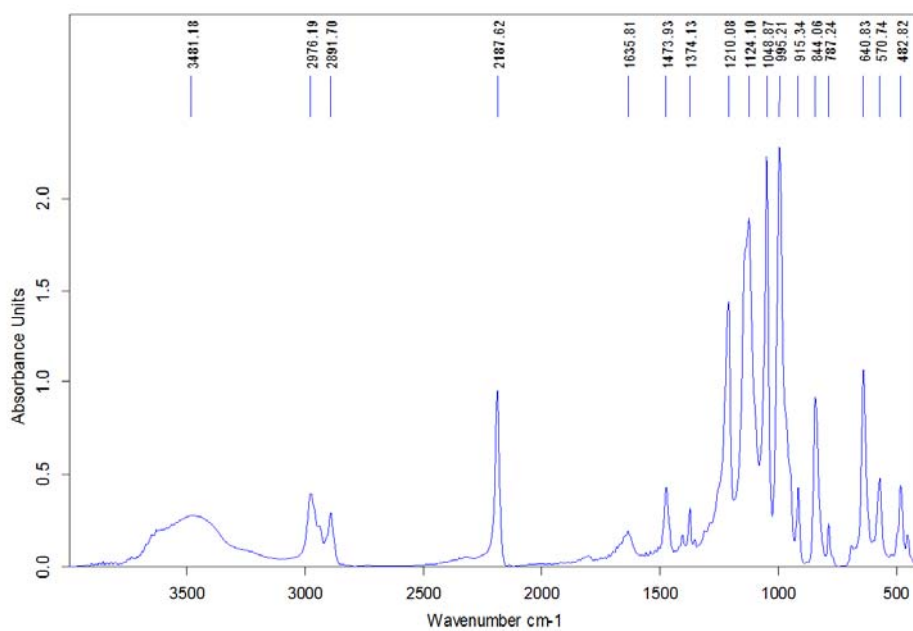

Figure S3. IR spectrum of 2

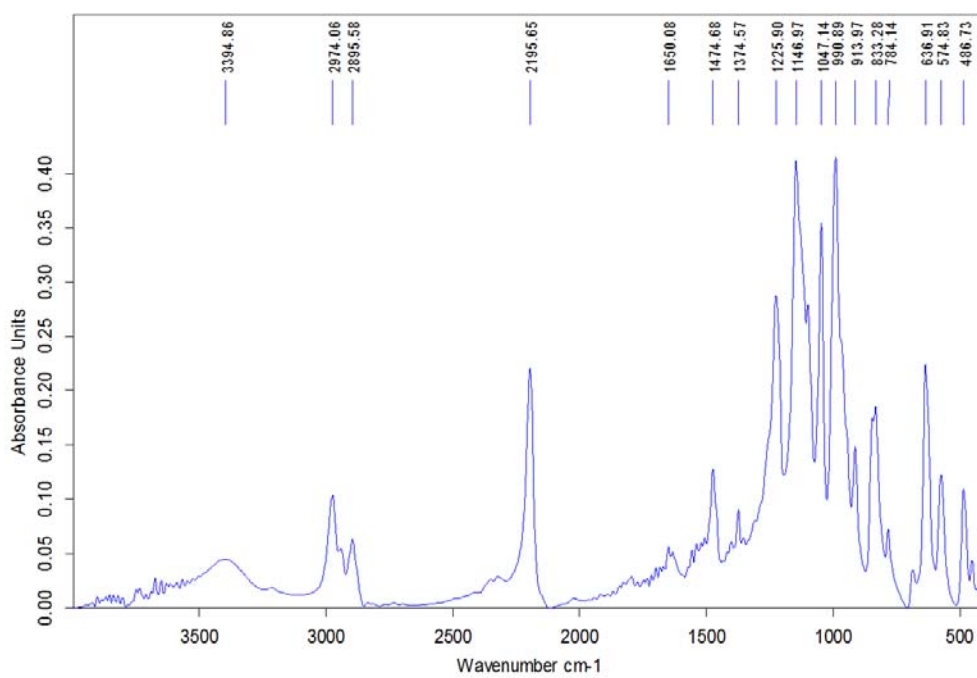

Figure S4. IR spectrum of 3

## The electronic absorption spectra

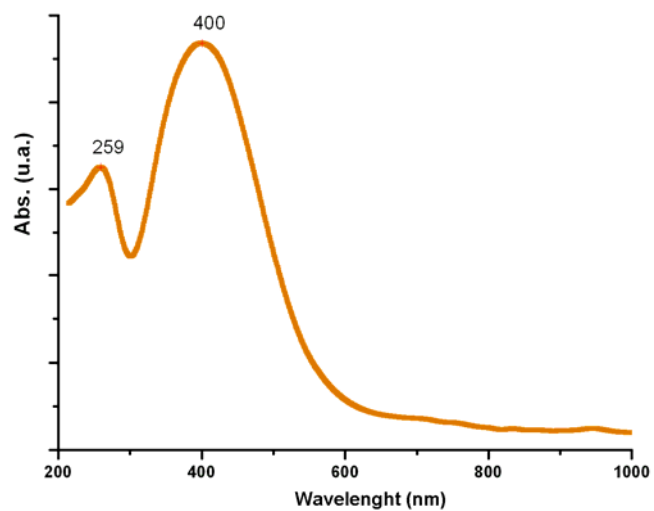

**Figure S5** The electronic absorption spectrum in diffuse reflectance mode in the solid state for **2**

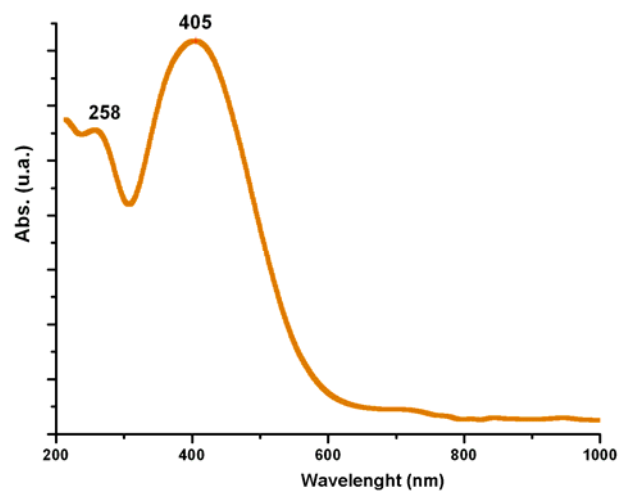

**Figure S6** The electronic absorption spectrum in diffuse reflectance mode in the solid state for **3**

### PXRD characterization compound 3

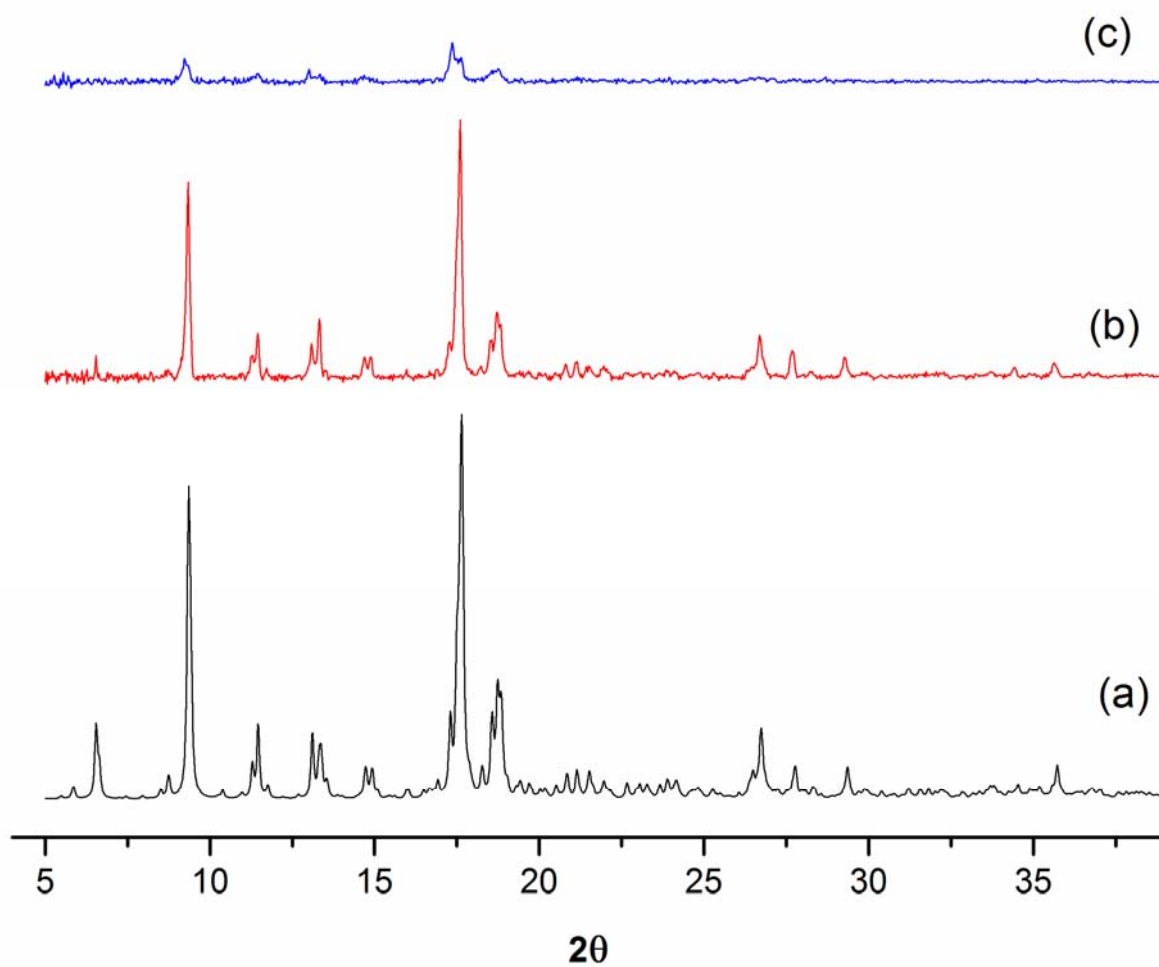

**Figure S7** Comparison of the simulated (a), recorded (b) and recorded after deshydration at 373K for 1 hour under vacuum (c) , PXRD pattern for **3**.
